# Supplementary material for: Building Better Scientists through Cross-Disciplinary Collaboration in Synthetic Biology: A Report from the Genome Consortium for Active Teaching Workshop 2010
Source: Atypon-hosted journal article supplement (doi:10.1187/cbe.10-07-0097), 2010-12-01
Supplement: supp_matt_b.pdf [file supp_matt_b.pdf]

## Post-assessment Survey for GCAT Synthetic Biology

Thank you for volunteering this information for the meeting report being conducted by the participants of the First Faculty Training in Synthetic Biology supported by GCAT.

Based on your experiences at this meeting, please answer the following questions:

### **Perceptions of Synthetic Biology/Personal Goals**

1.) Has your perception of synthetic biology changed? What, if anything, makes synthetic biology a unique field?

2.) Do you now feel more capable of teaching synthetic biology to undergraduates?

1            2            3            4            5

Not at all-----Totally

Briefly explain:

3.) How comfortable do you now feel with conducting synthetic biology-based research projects with undergraduates?

1            2            3            4            5

Not at all-----Totally

Briefly explain:

4.) Do you currently have the tools to make your undergraduate students feel comfortable with the concepts of synthetic biology?

1            2            3            4            5

Not at all-----Totally

Briefly explain:

5.) Do you think that your undergraduate students will be able to master the concepts of synthetic biology? In your opinion, what would be the best ways for your students to obtain mastery of this subject?

6.) Do you feel that you are now better equipped to work with individuals outside of your discipline in collaborative research?

1            2            3            4            5  
Not at all-----Totally

Briefly explain:

During the academic year, how often do you envision you will meet with your partner?

7.) How comfortable do you feel in your ability to establish cross-disciplinary collaborations?

1            2            3            4            5  
Not at all-----Totally

Briefly explain:

8.) What would prohibit you from engaging in research in synthetic biology? What are your perceived roadblocks?

9.) How do you envision utilizing synthetic biology in your student-led research? How will this work ultimately be presented?

10.) Do you envision incorporating synthetic biology into your coursework? What course(s) and in what way?

11.) How much time and effort do you feel you will be able to put into developing the ideas and materials necessary to successfully conduct synthetic biology work with your undergraduates?

1            2            3            4            5  
Very little-----as much as it takes

12.) Would you feel comfortable with this preparation effort given your current teaching load?  
1            2            3            4            5  
Not at all-----Totally

Briefly explain:

13.) Briefly describe what you see as the primary benefits of synthetic biology for your undergraduate students.

14.) Were your personal expectations for this workshop met? Explain.

15.) Has this workshop made you feel better about any initial reservations you may have had about working with synthetic biology?

16.) Provide a brief summary of your overall reaction to the workshop and its utility. Are there general improvements you would suggest for this meeting in the future?

Thank you!
